# Supplementary material
Source: Springer Nature journal article supplement (https://www.springermedizin.de/resource/supplementary/12913_2012_2402_MOESM5_ESM.pdf/9530452)

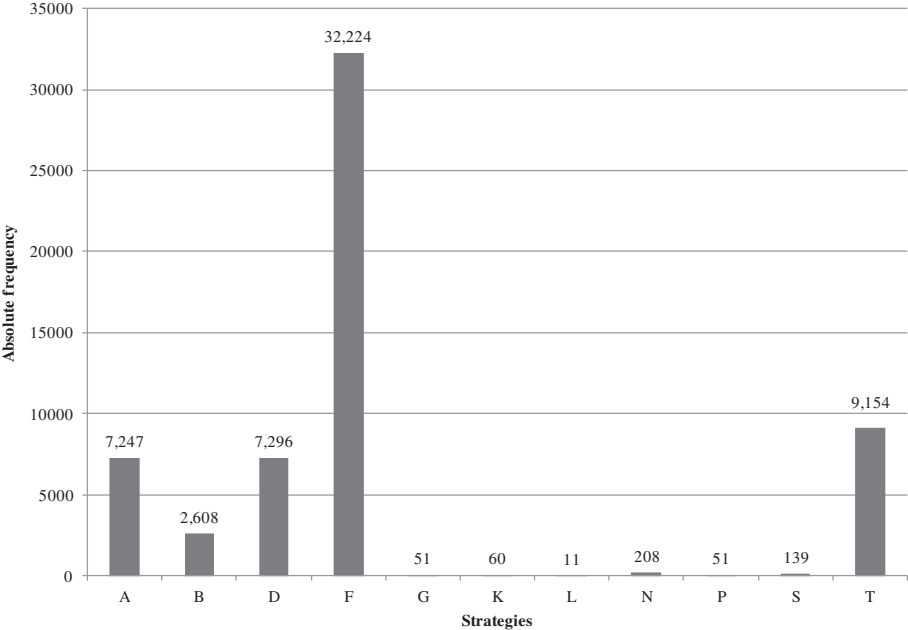

n = 59,049

In none of these scenarios did the Strategies C, E, H, I, M, O, Q and R cause the highest costs

Supplement: MOESM5 [file 9530452]
